# Supplementary material
Source: PubMed Central journal article supplement (PMC5748904)
Supplement: ASN.2017020222SupplementaryData1.pdf [file ASN.2017020222SupplementaryData1.pdf]

Supplementary Table 1: Primer Sequences used for RT-QPCR

|           | Forward primer sequences | Reverse primer sequences |
|-----------|--------------------------|--------------------------|
| mSREBP-1c | GCAGCCACCATCTAGCCTG      | CAGCAGTGAGTCTGCCTTGAT    |
| mSCD-1    | TTCTTGCGATACTCTGGTGC     | CGGGATTGAATGTTCTTGTCGT   |
| mSCD-2    | GCATTTGGGAGCCTTGTACG     | AGCCGTGCCTTGTATGTTCTG    |
| mFit-1    | CCTCTGCCTTACTGTACTTTGG   | TAGCGAAGATCGTCCGAGAGT    |
| mAT2R     | CGCAACTGGCACCAATGAG      | AGGGAGGGTAGCCAAAAGGAG    |
| mRenR     | CTGGTGGCGGGTGCTTTAG      | GCTACGTCTGGGATTCGATCT    |
| mAGT      | ATGCACAGATCGGAGATGACT    | CATGCAGGGTCTTCTCATTAC    |
| mMas      | CCTATCGGTCCTCTACCCCAT    | AGAAGGGCACAGACGAATGC     |
| mSgk-1    | TGGGCTATCTGCACTCCCTAA    | ATGTTGTCCCGTTATGCTCAAT   |
| mSREBP-2  | GCAGCAACGGGACCATTCT      | CCCCATGACTAAGTCCTTCAACT  |
| mp65      | TGCGATTCCGCTATAAATGCG    | ACAAGTTCATGTGGATGAGGC    |
| mp50      | GGGGCCTGCAAAGGTTATC      | TGCTGTTACGGTGCATACCC     |
| mNox2     | AGTGCGTGTTGCTCGACAA      | GCGGTGTGCAGTGCTATCAT     |
| mp22phox  | TGCCAGTGTGATCTATCTGCT    | TCGGCTTCTTTCCGGACCTCT    |
| mHif1a    | TCTCGGCGAAGCAAAGAGTC     | AGCCATCTAGGGCTTTCAGATAA  |
| mHif2a    | GAGGAAGGAGAAATCCCGTGA    | TATGTGTCCGAAGGAAGCTGA    |
| mFXR      | GGCAGAATCTGGATTTGGAATCG  | GCCCAGGTTGGAATAGTAAGACG  |
| mTGR5     | TGCTTCTTCCTAAGCCTACTACT  | CTGATGGTTCGCGCTCCATAG    |
| mTLR4     | ATGGCATGGCTTACACCACC     | GAGGCCAATTTTGTCTCCACA    |
| mCyp7b1   | GGAGCCACGACCCTAGATG      | GCCATGCCAAGATAAGGAAGC    |
| mCyp27a1  | GCACAGGAGAGTACGGAGG      | CGGGCAAGTGCAGCACATA      |
| mASBT     | CCCAAATGCAACTGTCTGCG     | CACCCCATAGAAAACATCACCA   |
| mOSTa     | TCTGCACCCACGGTGGTAT      | GGCCATTTCTACAAGTGTGAGG   |
| mOSTb     | AGATGCGGCTCCTTGGAAATTA   | TGGCTGCTTCTTTTCGATTTCTG  |
| mMrp3     | CTGGGTCCCCTGCATCTAC      | GCCGTCTTGAGCCTGGATAAC    |

## Supplement Figure 1

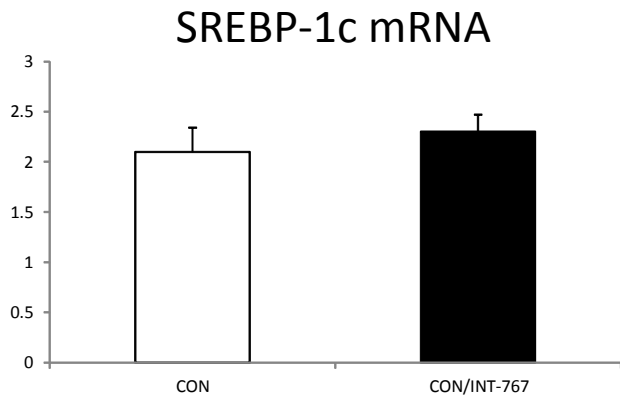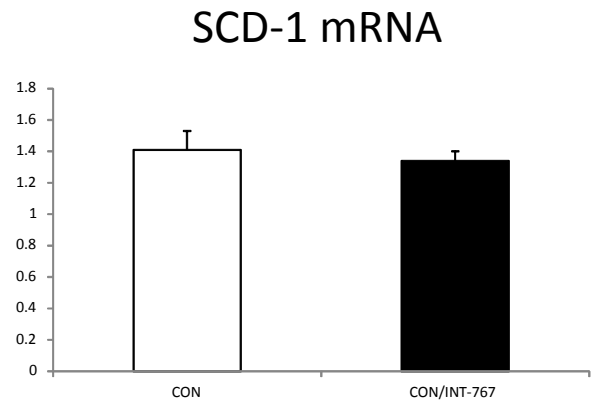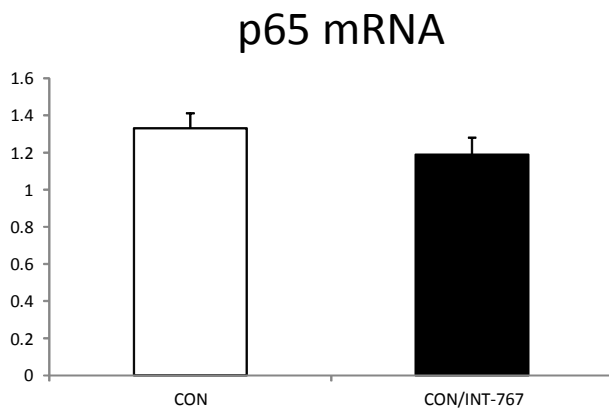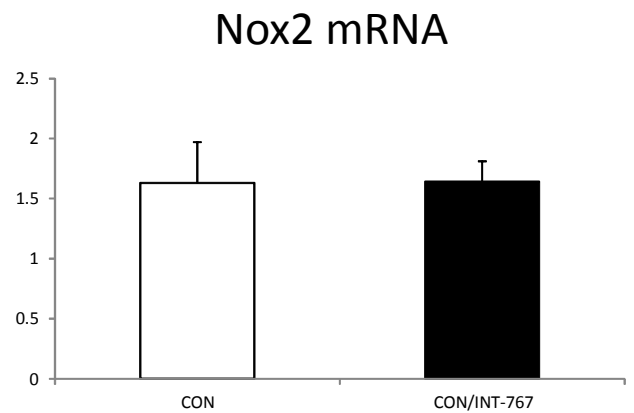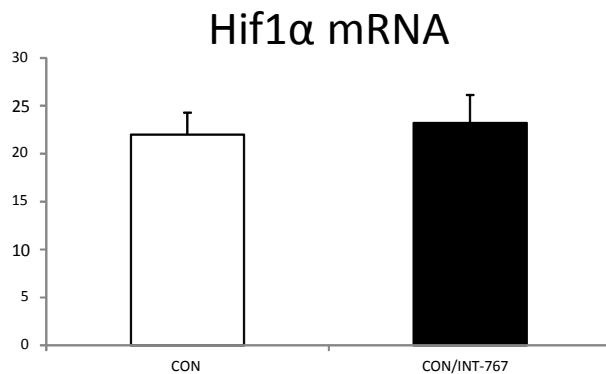

Treatment with INT-767 did not change SREBP-1c, SCD-1, p65, Nox2, or Hif1 $\alpha$  gene expression in control, non-diabetic kidneys. (n=6 mice per group).

## Supplement Figure 2

### 24hr UAE

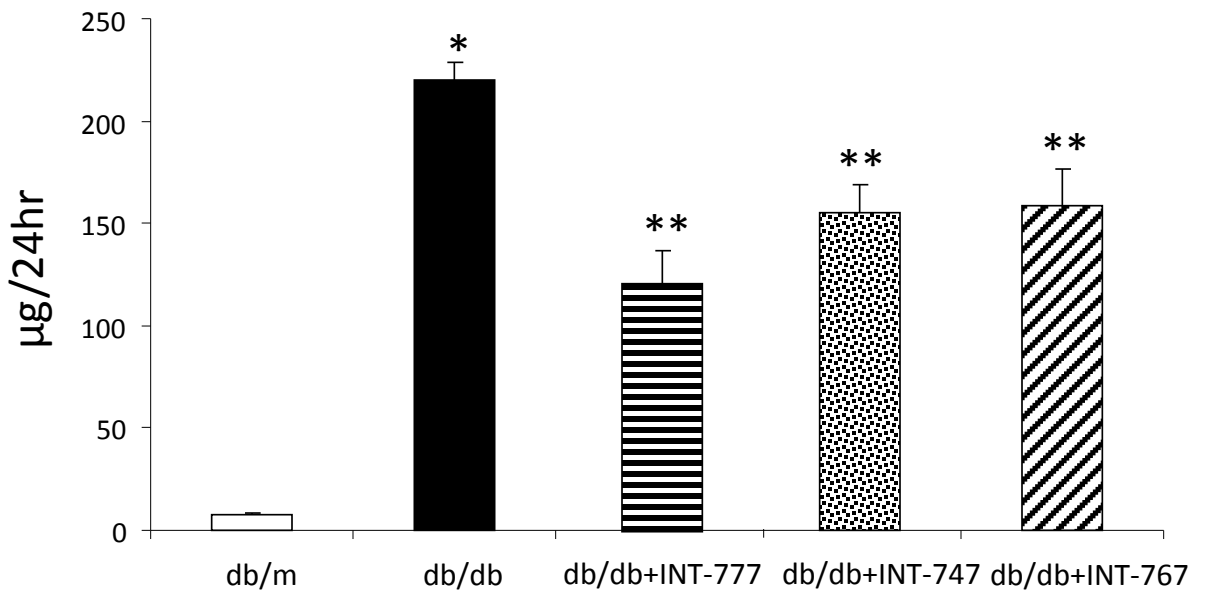

Treatment with INT-747, INT-767 or INT-777 prevents the increase in urinary albumin excretion in db-db mice. \* $P < 0.05$  versus db/m; † $P < 0.05$  versus db/db (n=6 mice per group).
